In the article by Jiang et al., entitled “Predictive Factors of Contralateral Operation after Initial Pyeloplasty in Children with Antenatally Detected Bilateral Hydronephrosis Due to Ureteropelvic Junction Obstruction” [Urol Int 2018;100:322–326, DOI: 10.1159/000487196], all authors should be affiliated under Department of Pediatric Urology, Xinhua Hospital, Shanghai Jiao Tong University School of Medicine, Shanghai, China, only.
